# Supplementary material for: Capturing the domain crosstalk in full length LRRK2 and LRRK2RCKW
Source: PubMed Central journal article supplement (PMC10317166; doi:10.1042/bcj20230126), 2023-06-12
Supplement: BCJ-480-815-s1.pdf [file BCJ-480-815-s1.pdf]

Figure S1

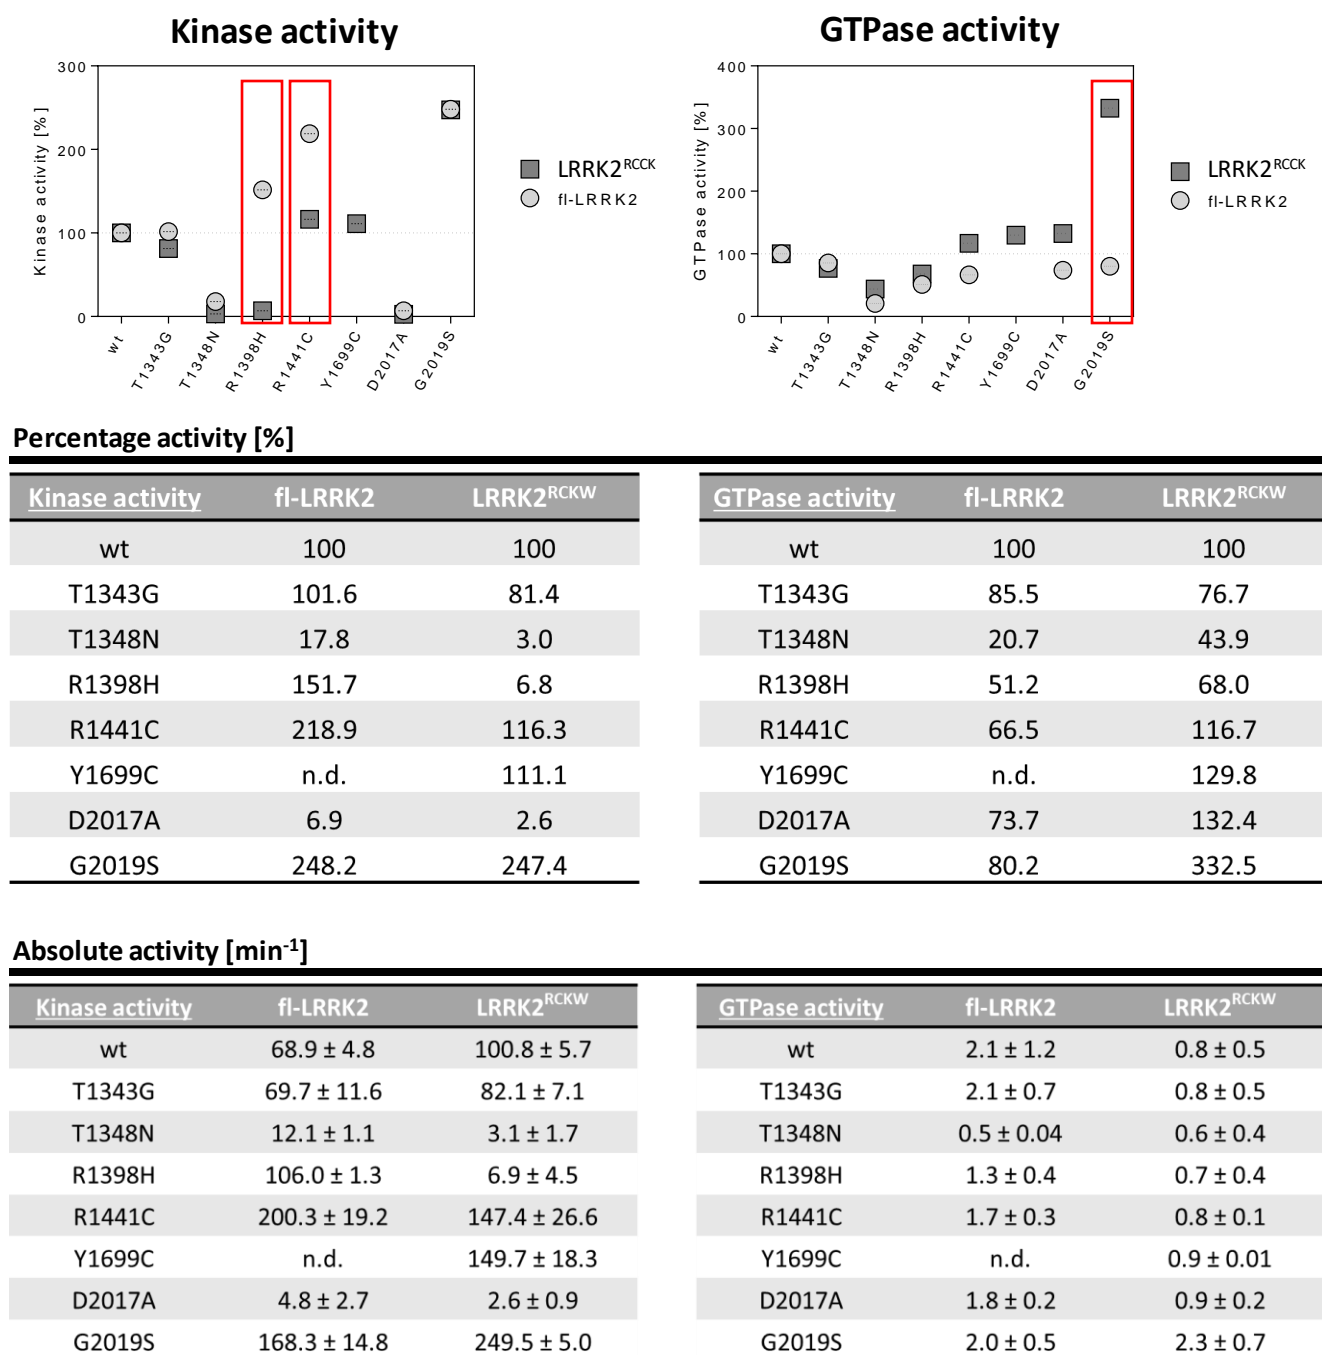

**Figure S1. Summarized enzymatic activities of all tested LRRK2 variants.** Side-by-side comparisons of the percentage activities of fl-LRRK2 and LRRK2<sup>RCKW</sup> variants (top panel) show that the most apparent differences are contributed by the PD related mutations R1398H, R1441C and G2019S (red rectangles). The mid panel shows relative activities [%] and the lower panel shows the absolute activities [min<sup>-1</sup>] (± SD) of all tested LRRK2 variants (n.d.: not determined).

Figure S2

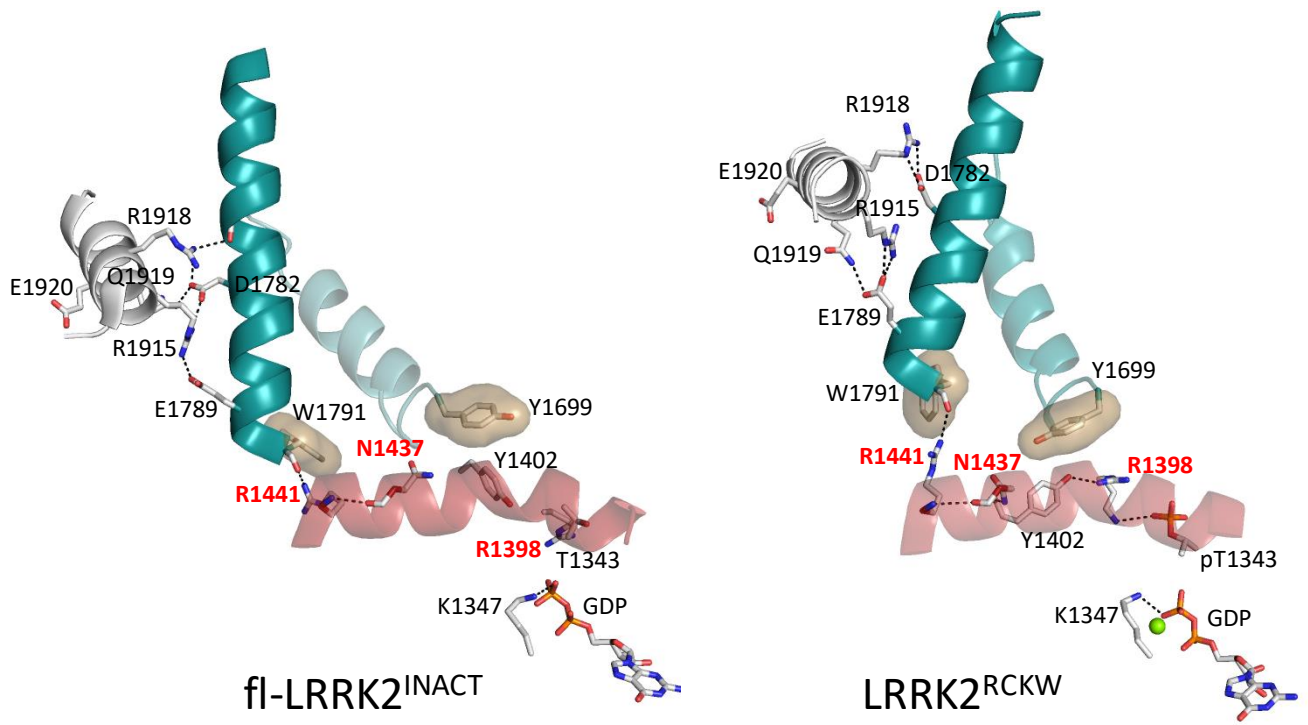

**Figure S2. Rigid body motion of key helices in fl-LRRK2<sup>INACT</sup> and LRRK2<sup>RCKW</sup>.** Here we show how the two helices in the COR-B domain interact with  $\alpha$ C helix in the kinase domain and with the interface with the  $\alpha$ 3<sup>ROC</sup> helix in the ROC domain. PD mutations at the ROC:CORB interface are highlighted in red.

Figure S3

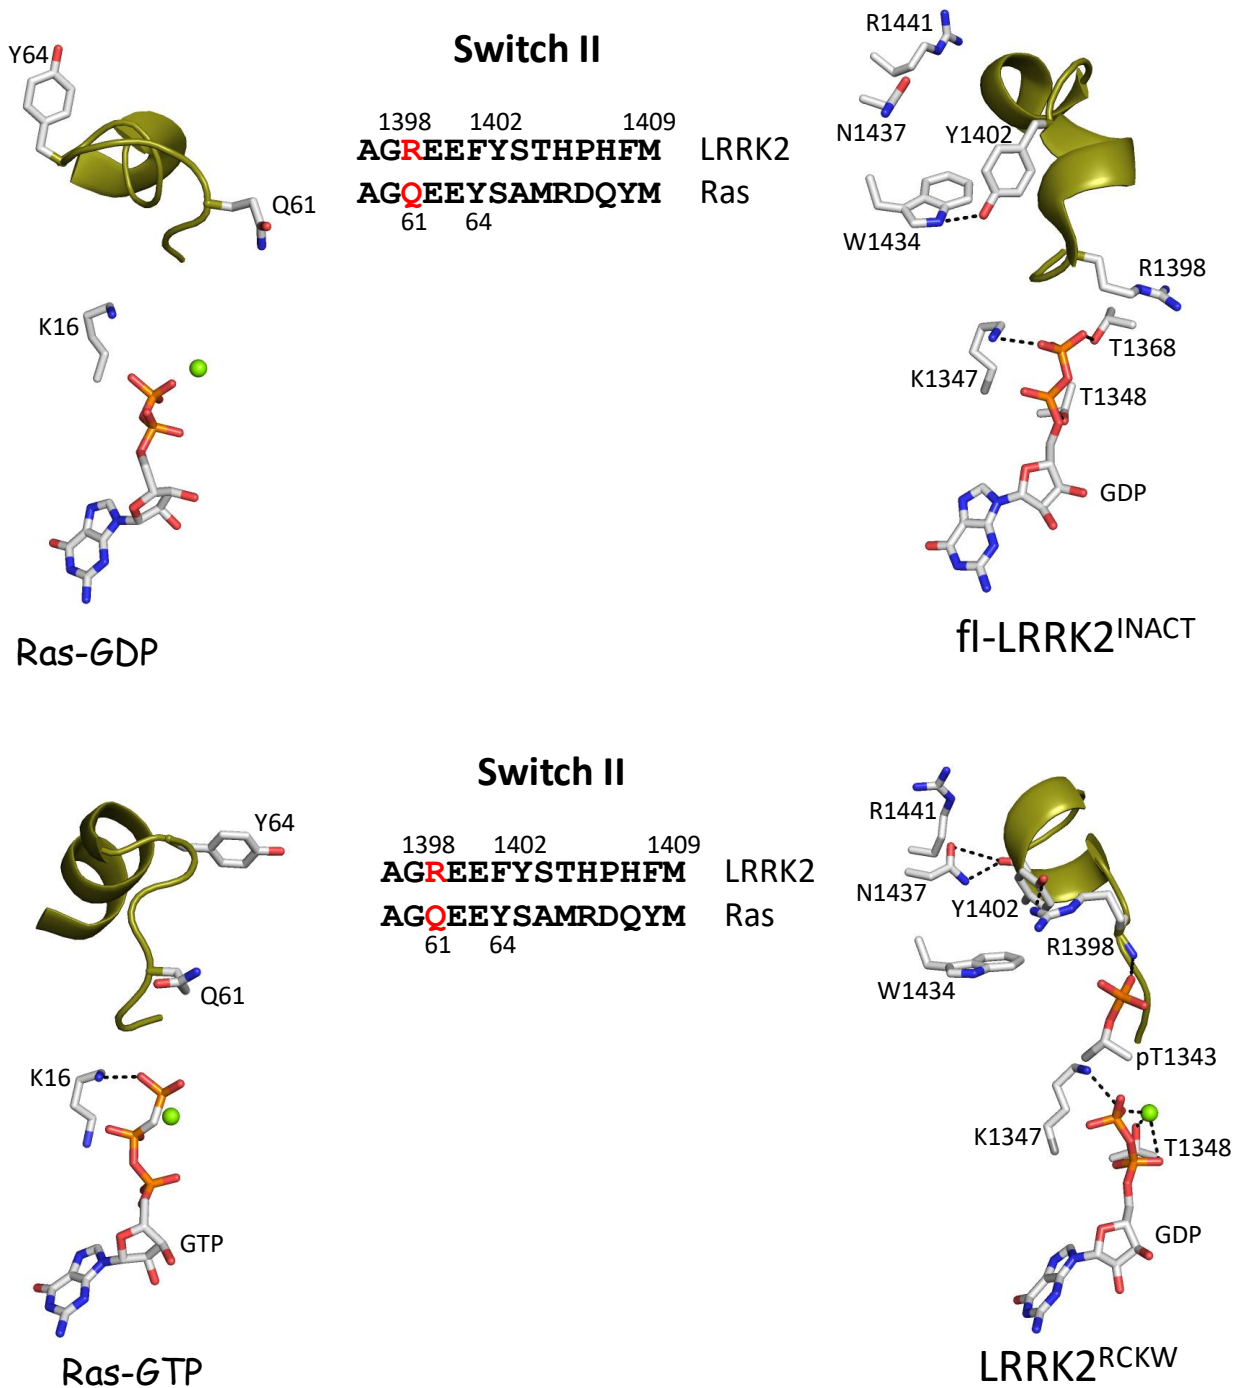

**Figure S3. Comparing conformations of Switch II in GDP/GTP bound Ras with conformations of Switch II in fl-LRRK2<sup>INACT</sup> and LRRK2<sup>RCKW</sup>.** Top panel compares the GDP-bound state of Ras with fl-LRRK2<sup>INACT</sup>. Bottom panel captures the major conformational changes in Ras when GTP is bound, and compares them to the changes we see in Switch II in LRRK2<sup>RCKW</sup>. The Switch II sequences of Ras and LRRK2 are shown in the Middle.

Figure S4

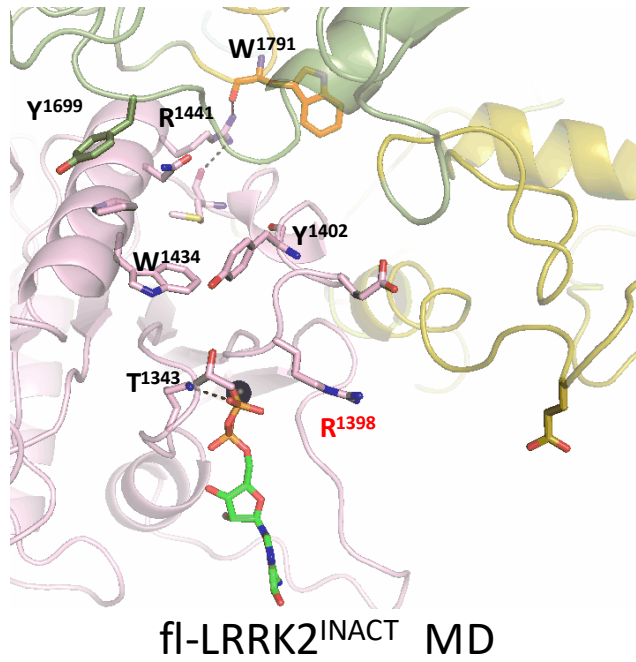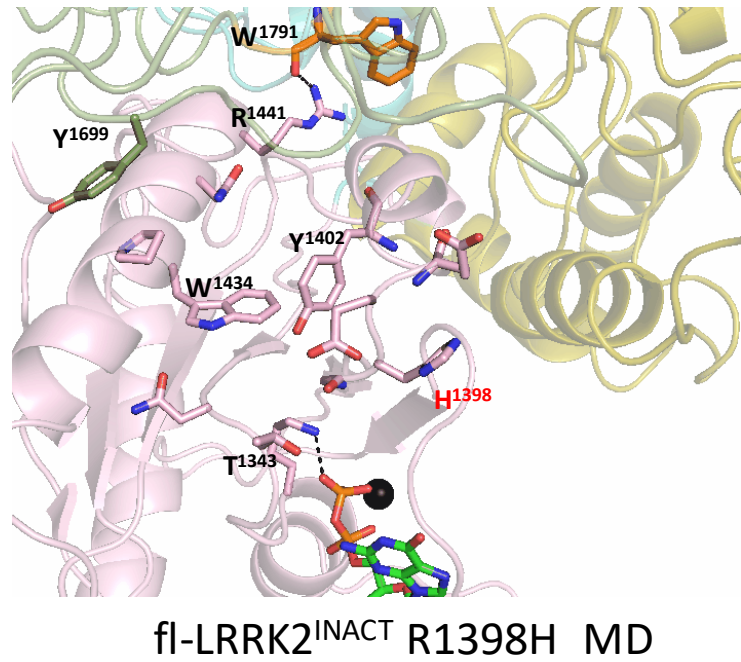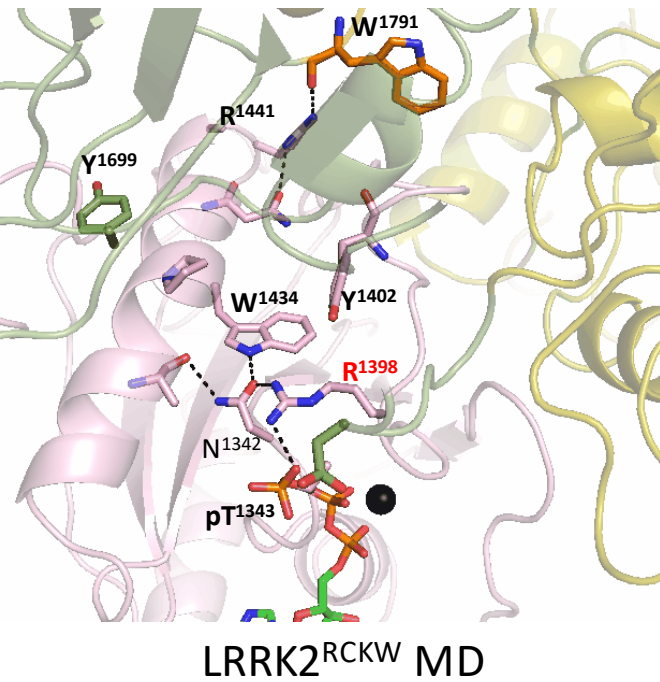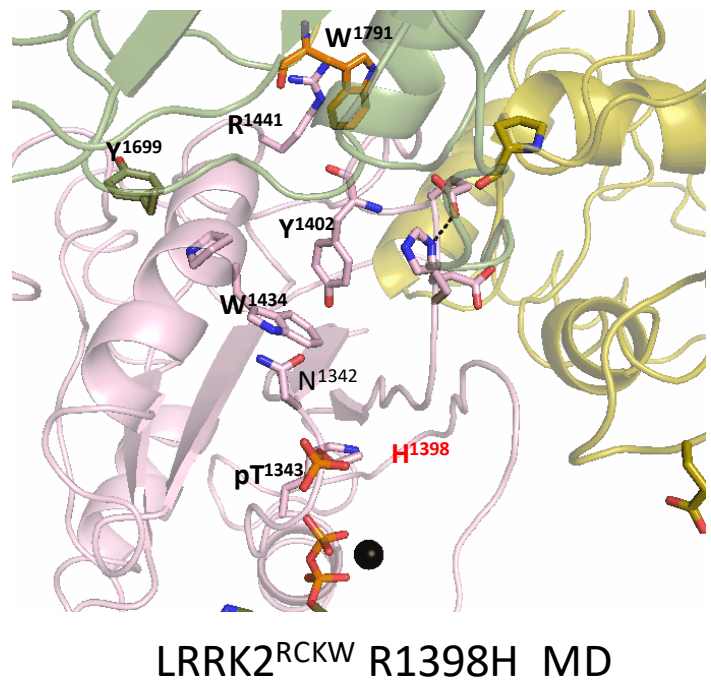

**Figure S4. GaMD simulations of the ROC domain in fi-LRRK2<sup>INACT</sup> and LRRK2<sup>RCKW</sup>.** Top panel shows fi-LRRK2<sup>INACT</sup>; bottom panels show LRRK2<sup>RCKW</sup>. Left panels show WT LRRK2, while right panels show R1398H mutations.

Figure S5

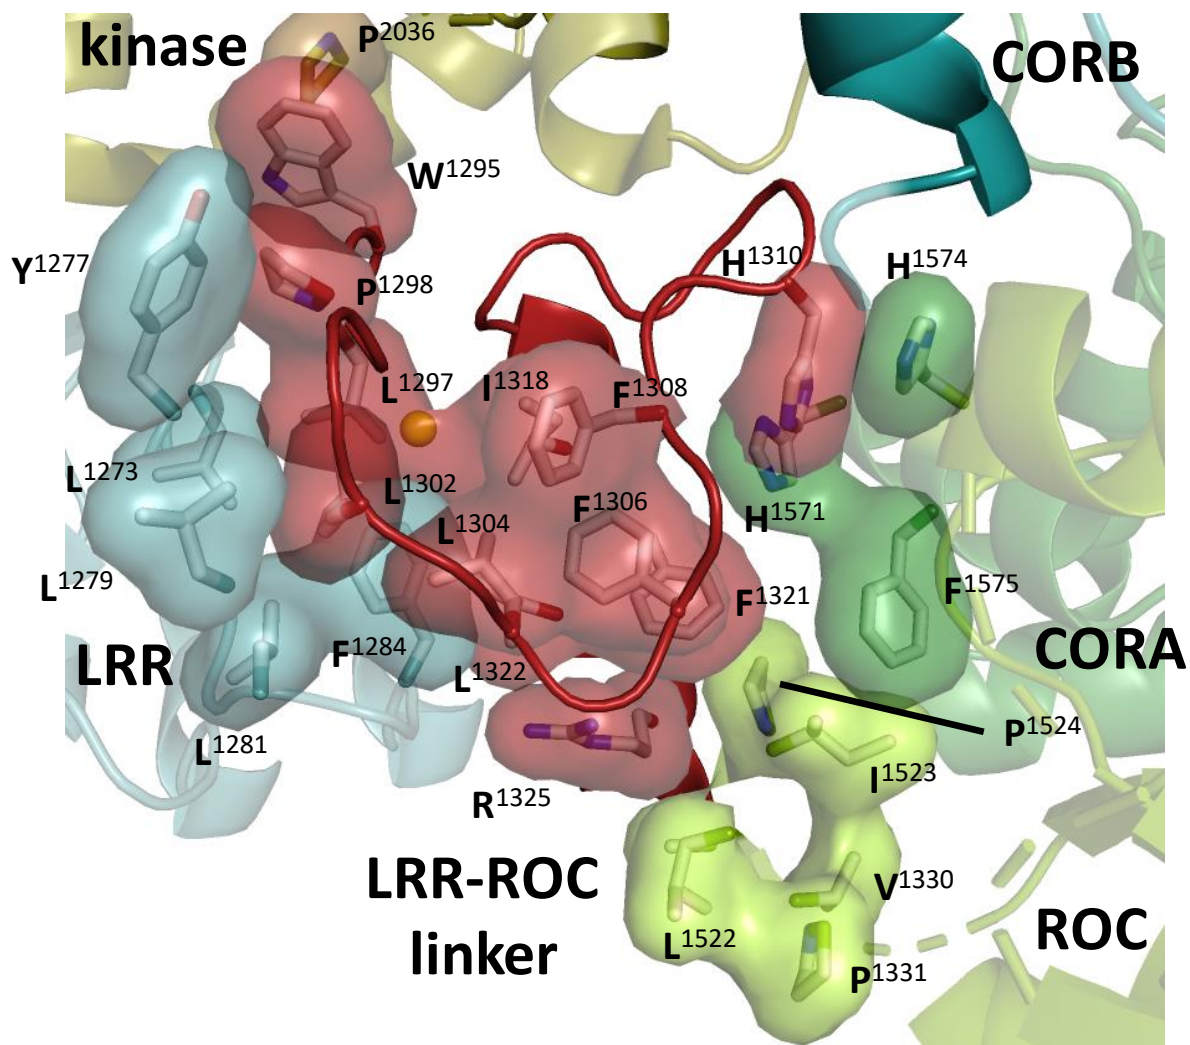

1290KLSKIWDLPLDELHLNFDFKHIGCKAKDIIRFLQQRLLK1328

fl-LRRK2<sup>INACT</sup>

**Figure S5. Hydrophobic interface of LRR-ROC linker.** The LRR-ROC linker in fl-LRRK2<sup>INACT</sup> is ordered by hydrophobic packing from residues in the LRR (teal), ROC (lime), and COR-A (dark green) domains. The C-lobe of the kinase domain is in tan.
